# Supplementary material
Source: MDPI journal article supplement (https://www.mdpi.com/2073-4344/13/11/1404)
Supplement: s1 [file s1 › catalysts-2620173-supplementary.pdf]

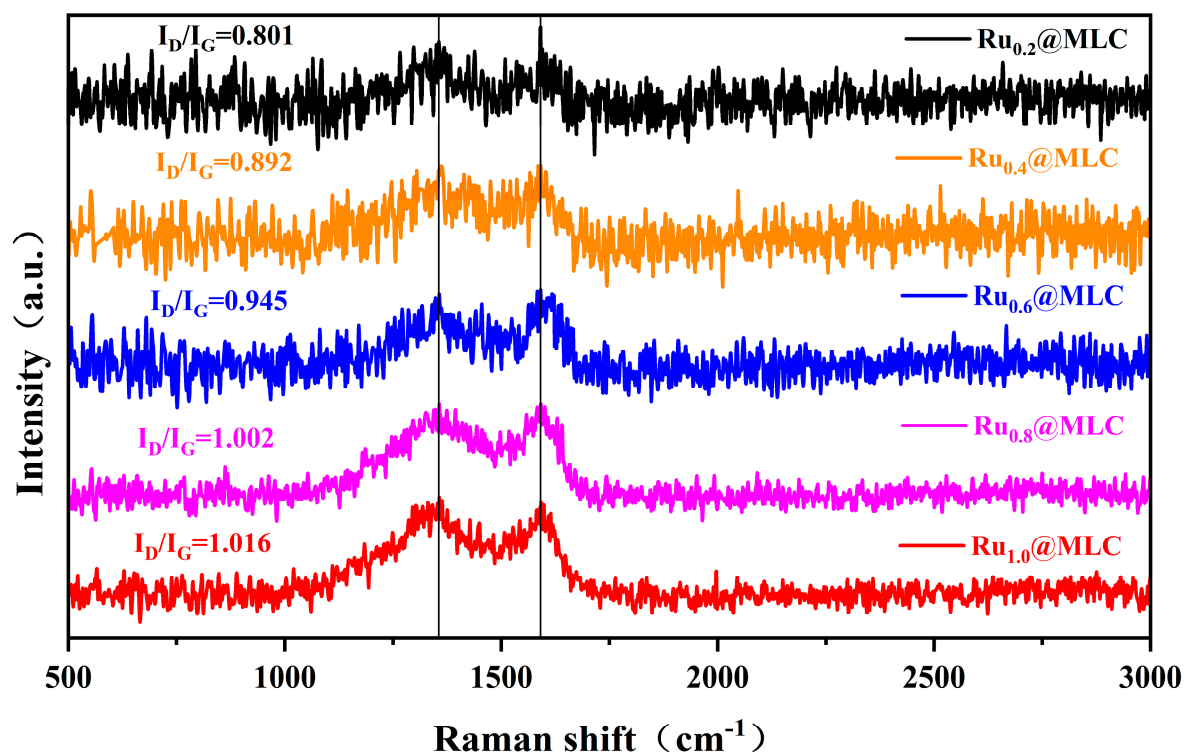

**Figure S1.** Raman Spectrum of  $\text{Ru}_{0.2}@\text{MLC}$ ,  $\text{Ru}_{0.4}@\text{MLC}$ ,  $\text{Ru}_{0.6}@\text{MLC}$ ,  $\text{Ru}_{0.8}@\text{MLC}$  and  $\text{Ru}_{1.0}@\text{MLC}$ .
